# Supplementary material for: Use of traditional eye medicine and self-medication in rural India: A population-based study
Source: PubMed Central journal article supplement (PMC5567472; doi:10.1371/journal.pone.0183461), 2017-08-22
Supplement: pone.0183461.s001.pdf [file pone.0183461.s001.pdf]

## कार्निया फार्म –IV

कार्नियल अस्पष्टता संबंधी समुदाय आधारित एपिडिमियोलॉजिकल अध्ययन

| IDENTIFICATION DATA<br>पहचान तथ्य                                                   | RESPONSE CATEGORIES<br>उत्तरदाता श्रेणी                                     | FOR OFFICE USE ONLY<br>केवल कार्यालय हेतु                                                                                                                                    |
|-------------------------------------------------------------------------------------|-----------------------------------------------------------------------------|------------------------------------------------------------------------------------------------------------------------------------------------------------------------------|
| Name of Village<br>ग्राम का नाम                                                     | _____                                                                       | [ ] [ ]                                                                                                                                                                      |
| Cluster Code<br>समूह संख्या                                                         | _____                                                                       | [ ] [ ]                                                                                                                                                                      |
| Household ID<br>मकान को दिया गया नम्बर                                              | <b>Study House No.</b> _____                                                | [ ] [ ] [ ] [ ] [ ] [ ] [ ]<br>Location ID (1) + Cluster ID (2)+ HH No. (3)<br>जगह संख्या (1) + समूह संख्या (2)+ मकान संख्या (3)                                             |
| Interviewer Name and Code<br>साक्षात्कारकर्ता का नाम एवं कोड                        | [ ] [ ] [ ]                                                                 | [ ] [ ] [ ]                                                                                                                                                                  |
| Respondent Name<br>उत्तरदाता का नाम                                                 |                                                                             |                                                                                                                                                                              |
| Person Unique ID No.<br><b>(From Enumeration Form)</b><br>व्यक्ति को दिया गया नम्बर | Person Number. _____<br>व्यक्ति का नम्बर _____                              | [ ] [ ] [ ] [ ] [ ] [ ] [ ] [ ] [ ] [ ]<br>Location ID (1)+ Cluster ID (2)+ HH No (3) + Person No(2)<br>जगह संख्या (1) + समूह संख्या (2)+ मकान संख्या (3) + सदस्य संख्या (2) |
| Gender<br>लिंग                                                                      | Male=1;                  Female=2<br>पुरुष = 1;                  स्त्री = 2 | [ ]                                                                                                                                                                          |
| Age<br>उम्र                                                                         | _____ (In completed years)<br>(निकटतम वर्ष में)                             | [ ] [ ] [ ]                                                                                                                                                                  |
| Date of Interview<br>साक्षात्कार की तिथि                                            | <b>(dd/mm/yyyy)</b> --/--/-----                                             | [ ] [ ] [ ] - [ ] [ ] [ ] - [ ] [ ] [ ] [ ] [ ]                                                                                                                              |

**आँखों की बिमारी संबंधित जानकारी, स्वभाव एवं व्यवहार का मूल्यांकन**

| S.No. | Question                                                                                                                                                                                                   | Response | Marking Guide                                                                                                                                                                                                                                                 |
|-------|------------------------------------------------------------------------------------------------------------------------------------------------------------------------------------------------------------|----------|---------------------------------------------------------------------------------------------------------------------------------------------------------------------------------------------------------------------------------------------------------------|
| 1.    | <p>What are the common symptoms of eye diseases?<br/><b>(Multiple response possible)</b></p> <p>आप के अनुसार आँखों की बिमारियों के क्या-क्या लक्षण हो सकते हैं ?<br/><b>(एक से अधिक उत्तर संभव है)</b></p> |          | <p>a. सर दर्द<br/>b. आँखों का लाल होना<br/>c. आँखों से पानी आना<br/>d. आँखों से कीचड़ आना<br/>e. आँखों में जलन<br/>f. खुजली होना<br/>g. आँखों में किरकिरापन/रगड़न होना<br/>h. आँखों में दर्द होना<br/>i. धुंधलापन<br/>j. अन्य<br/>k. नहीं मालूम</p>           |
| 2.    | <p>Which eye diseases have you heard of?<br/><b>(Multiple response possible)</b></p> <p>आपने आँखों की कौन -कौन सी बिमारियों के बारे में सुना है?<br/><b>(एक से अधिक उत्तर संभव है)</b></p>                 |          | <p>a. आईफ्लु (Eye flu), संक्रमण<br/>b. दृष्टिदोष<br/>c. मोतियाबिन्द<br/>d. रोहे/कुर्कुरे/परबाल<br/>e. काला मोतिया<br/>f. भेंगापन<br/>g. फूला<br/>h. रतौंधी<br/>i. विटामिन 'A' की कमी (विटामिन 'A' डिफिसिएन्सी)<br/>j. नखूना<br/>k. अन्य<br/>l. नहीं मालूम</p> |

| 3.                                                      | <p>Have you heard about the following eye diseases?<br/>क्या आप ने आँखों की इन बिमारियों के बारे में सुना है?</p>                                                                                                                                  | <table style="width: 100%; border: none;"> <thead> <tr> <th style="width: 50%;"></th> <th style="width: 25%; text-align: center;">हाँ</th> <th style="width: 25%; text-align: center;">नहीं</th> </tr> </thead> <tbody> <tr> <td>a. आईफ्लु (Eye flu), संक्रमण</td> <td style="text-align: center;"><input type="checkbox"/></td> <td style="text-align: center;"><input type="checkbox"/></td> </tr> <tr> <td>b. दृष्टिदोष</td> <td style="text-align: center;"><input type="checkbox"/></td> <td style="text-align: center;"><input type="checkbox"/></td> </tr> <tr> <td>c. मोतियाबिन्द</td> <td style="text-align: center;"><input type="checkbox"/></td> <td style="text-align: center;"><input type="checkbox"/></td> </tr> <tr> <td>d. रोहे/कुर्कुरे/परबाल</td> <td style="text-align: center;"><input type="checkbox"/></td> <td style="text-align: center;"><input type="checkbox"/></td> </tr> <tr> <td>e. काला मोतिया</td> <td style="text-align: center;"><input type="checkbox"/></td> <td style="text-align: center;"><input type="checkbox"/></td> </tr> <tr> <td>f. भेंगापन</td> <td style="text-align: center;"><input type="checkbox"/></td> <td style="text-align: center;"><input type="checkbox"/></td> </tr> <tr> <td>g. फूला</td> <td style="text-align: center;"><input type="checkbox"/></td> <td style="text-align: center;"><input type="checkbox"/></td> </tr> <tr> <td>h. आँख की पारदर्शी झिल्ली पर सफेद दाग (Corneal Opacity)</td> <td style="text-align: center;"><input type="checkbox"/></td> <td style="text-align: center;"><input type="checkbox"/></td> </tr> <tr> <td>i. रतौधी</td> <td style="text-align: center;"><input type="checkbox"/></td> <td style="text-align: center;"><input type="checkbox"/></td> </tr> <tr> <td>j. विटामिन 'A' की कमी (विटामिन 'A' डिफिसिएन्सी)</td> <td style="text-align: center;"><input type="checkbox"/></td> <td style="text-align: center;"><input type="checkbox"/></td> </tr> <tr> <td>k. नखूना</td> <td style="text-align: center;"><input type="checkbox"/></td> <td style="text-align: center;"><input type="checkbox"/></td> </tr> </tbody> </table> |                                                                                                                                                                                                         | हाँ | नहीं | a. आईफ्लु (Eye flu), संक्रमण | <input type="checkbox"/> | <input type="checkbox"/> | b. दृष्टिदोष | <input type="checkbox"/> | <input type="checkbox"/> | c. मोतियाबिन्द | <input type="checkbox"/> | <input type="checkbox"/> | d. रोहे/कुर्कुरे/परबाल | <input type="checkbox"/> | <input type="checkbox"/> | e. काला मोतिया | <input type="checkbox"/> | <input type="checkbox"/> | f. भेंगापन | <input type="checkbox"/> | <input type="checkbox"/> | g. फूला | <input type="checkbox"/> | <input type="checkbox"/> | h. आँख की पारदर्शी झिल्ली पर सफेद दाग (Corneal Opacity) | <input type="checkbox"/> | <input type="checkbox"/> | i. रतौधी | <input type="checkbox"/> | <input type="checkbox"/> | j. विटामिन 'A' की कमी (विटामिन 'A' डिफिसिएन्सी) | <input type="checkbox"/> | <input type="checkbox"/> | k. नखूना | <input type="checkbox"/> | <input type="checkbox"/> |  |
|---------------------------------------------------------|----------------------------------------------------------------------------------------------------------------------------------------------------------------------------------------------------------------------------------------------------|---------------------------------------------------------------------------------------------------------------------------------------------------------------------------------------------------------------------------------------------------------------------------------------------------------------------------------------------------------------------------------------------------------------------------------------------------------------------------------------------------------------------------------------------------------------------------------------------------------------------------------------------------------------------------------------------------------------------------------------------------------------------------------------------------------------------------------------------------------------------------------------------------------------------------------------------------------------------------------------------------------------------------------------------------------------------------------------------------------------------------------------------------------------------------------------------------------------------------------------------------------------------------------------------------------------------------------------------------------------------------------------------------------------------------------------------------------------------------------------------------------------------------------------------------------------------------------------------------------------------------------------------------------------------------------------------------------------------------------------------------------------------------------------------------------------------------------------------------------------------------------------------------------------------------------------------------------------------------------------------------------------------------------------------------------------------------------------------------------------------------------------|---------------------------------------------------------------------------------------------------------------------------------------------------------------------------------------------------------|-----|------|------------------------------|--------------------------|--------------------------|--------------|--------------------------|--------------------------|----------------|--------------------------|--------------------------|------------------------|--------------------------|--------------------------|----------------|--------------------------|--------------------------|------------|--------------------------|--------------------------|---------|--------------------------|--------------------------|---------------------------------------------------------|--------------------------|--------------------------|----------|--------------------------|--------------------------|-------------------------------------------------|--------------------------|--------------------------|----------|--------------------------|--------------------------|--|
|                                                         | हाँ                                                                                                                                                                                                                                                | नहीं                                                                                                                                                                                                                                                                                                                                                                                                                                                                                                                                                                                                                                                                                                                                                                                                                                                                                                                                                                                                                                                                                                                                                                                                                                                                                                                                                                                                                                                                                                                                                                                                                                                                                                                                                                                                                                                                                                                                                                                                                                                                                                                                  |                                                                                                                                                                                                         |     |      |                              |                          |                          |              |                          |                          |                |                          |                          |                        |                          |                          |                |                          |                          |            |                          |                          |         |                          |                          |                                                         |                          |                          |          |                          |                          |                                                 |                          |                          |          |                          |                          |  |
| a. आईफ्लु (Eye flu), संक्रमण                            | <input type="checkbox"/>                                                                                                                                                                                                                           | <input type="checkbox"/>                                                                                                                                                                                                                                                                                                                                                                                                                                                                                                                                                                                                                                                                                                                                                                                                                                                                                                                                                                                                                                                                                                                                                                                                                                                                                                                                                                                                                                                                                                                                                                                                                                                                                                                                                                                                                                                                                                                                                                                                                                                                                                              |                                                                                                                                                                                                         |     |      |                              |                          |                          |              |                          |                          |                |                          |                          |                        |                          |                          |                |                          |                          |            |                          |                          |         |                          |                          |                                                         |                          |                          |          |                          |                          |                                                 |                          |                          |          |                          |                          |  |
| b. दृष्टिदोष                                            | <input type="checkbox"/>                                                                                                                                                                                                                           | <input type="checkbox"/>                                                                                                                                                                                                                                                                                                                                                                                                                                                                                                                                                                                                                                                                                                                                                                                                                                                                                                                                                                                                                                                                                                                                                                                                                                                                                                                                                                                                                                                                                                                                                                                                                                                                                                                                                                                                                                                                                                                                                                                                                                                                                                              |                                                                                                                                                                                                         |     |      |                              |                          |                          |              |                          |                          |                |                          |                          |                        |                          |                          |                |                          |                          |            |                          |                          |         |                          |                          |                                                         |                          |                          |          |                          |                          |                                                 |                          |                          |          |                          |                          |  |
| c. मोतियाबिन्द                                          | <input type="checkbox"/>                                                                                                                                                                                                                           | <input type="checkbox"/>                                                                                                                                                                                                                                                                                                                                                                                                                                                                                                                                                                                                                                                                                                                                                                                                                                                                                                                                                                                                                                                                                                                                                                                                                                                                                                                                                                                                                                                                                                                                                                                                                                                                                                                                                                                                                                                                                                                                                                                                                                                                                                              |                                                                                                                                                                                                         |     |      |                              |                          |                          |              |                          |                          |                |                          |                          |                        |                          |                          |                |                          |                          |            |                          |                          |         |                          |                          |                                                         |                          |                          |          |                          |                          |                                                 |                          |                          |          |                          |                          |  |
| d. रोहे/कुर्कुरे/परबाल                                  | <input type="checkbox"/>                                                                                                                                                                                                                           | <input type="checkbox"/>                                                                                                                                                                                                                                                                                                                                                                                                                                                                                                                                                                                                                                                                                                                                                                                                                                                                                                                                                                                                                                                                                                                                                                                                                                                                                                                                                                                                                                                                                                                                                                                                                                                                                                                                                                                                                                                                                                                                                                                                                                                                                                              |                                                                                                                                                                                                         |     |      |                              |                          |                          |              |                          |                          |                |                          |                          |                        |                          |                          |                |                          |                          |            |                          |                          |         |                          |                          |                                                         |                          |                          |          |                          |                          |                                                 |                          |                          |          |                          |                          |  |
| e. काला मोतिया                                          | <input type="checkbox"/>                                                                                                                                                                                                                           | <input type="checkbox"/>                                                                                                                                                                                                                                                                                                                                                                                                                                                                                                                                                                                                                                                                                                                                                                                                                                                                                                                                                                                                                                                                                                                                                                                                                                                                                                                                                                                                                                                                                                                                                                                                                                                                                                                                                                                                                                                                                                                                                                                                                                                                                                              |                                                                                                                                                                                                         |     |      |                              |                          |                          |              |                          |                          |                |                          |                          |                        |                          |                          |                |                          |                          |            |                          |                          |         |                          |                          |                                                         |                          |                          |          |                          |                          |                                                 |                          |                          |          |                          |                          |  |
| f. भेंगापन                                              | <input type="checkbox"/>                                                                                                                                                                                                                           | <input type="checkbox"/>                                                                                                                                                                                                                                                                                                                                                                                                                                                                                                                                                                                                                                                                                                                                                                                                                                                                                                                                                                                                                                                                                                                                                                                                                                                                                                                                                                                                                                                                                                                                                                                                                                                                                                                                                                                                                                                                                                                                                                                                                                                                                                              |                                                                                                                                                                                                         |     |      |                              |                          |                          |              |                          |                          |                |                          |                          |                        |                          |                          |                |                          |                          |            |                          |                          |         |                          |                          |                                                         |                          |                          |          |                          |                          |                                                 |                          |                          |          |                          |                          |  |
| g. फूला                                                 | <input type="checkbox"/>                                                                                                                                                                                                                           | <input type="checkbox"/>                                                                                                                                                                                                                                                                                                                                                                                                                                                                                                                                                                                                                                                                                                                                                                                                                                                                                                                                                                                                                                                                                                                                                                                                                                                                                                                                                                                                                                                                                                                                                                                                                                                                                                                                                                                                                                                                                                                                                                                                                                                                                                              |                                                                                                                                                                                                         |     |      |                              |                          |                          |              |                          |                          |                |                          |                          |                        |                          |                          |                |                          |                          |            |                          |                          |         |                          |                          |                                                         |                          |                          |          |                          |                          |                                                 |                          |                          |          |                          |                          |  |
| h. आँख की पारदर्शी झिल्ली पर सफेद दाग (Corneal Opacity) | <input type="checkbox"/>                                                                                                                                                                                                                           | <input type="checkbox"/>                                                                                                                                                                                                                                                                                                                                                                                                                                                                                                                                                                                                                                                                                                                                                                                                                                                                                                                                                                                                                                                                                                                                                                                                                                                                                                                                                                                                                                                                                                                                                                                                                                                                                                                                                                                                                                                                                                                                                                                                                                                                                                              |                                                                                                                                                                                                         |     |      |                              |                          |                          |              |                          |                          |                |                          |                          |                        |                          |                          |                |                          |                          |            |                          |                          |         |                          |                          |                                                         |                          |                          |          |                          |                          |                                                 |                          |                          |          |                          |                          |  |
| i. रतौधी                                                | <input type="checkbox"/>                                                                                                                                                                                                                           | <input type="checkbox"/>                                                                                                                                                                                                                                                                                                                                                                                                                                                                                                                                                                                                                                                                                                                                                                                                                                                                                                                                                                                                                                                                                                                                                                                                                                                                                                                                                                                                                                                                                                                                                                                                                                                                                                                                                                                                                                                                                                                                                                                                                                                                                                              |                                                                                                                                                                                                         |     |      |                              |                          |                          |              |                          |                          |                |                          |                          |                        |                          |                          |                |                          |                          |            |                          |                          |         |                          |                          |                                                         |                          |                          |          |                          |                          |                                                 |                          |                          |          |                          |                          |  |
| j. विटामिन 'A' की कमी (विटामिन 'A' डिफिसिएन्सी)         | <input type="checkbox"/>                                                                                                                                                                                                                           | <input type="checkbox"/>                                                                                                                                                                                                                                                                                                                                                                                                                                                                                                                                                                                                                                                                                                                                                                                                                                                                                                                                                                                                                                                                                                                                                                                                                                                                                                                                                                                                                                                                                                                                                                                                                                                                                                                                                                                                                                                                                                                                                                                                                                                                                                              |                                                                                                                                                                                                         |     |      |                              |                          |                          |              |                          |                          |                |                          |                          |                        |                          |                          |                |                          |                          |            |                          |                          |         |                          |                          |                                                         |                          |                          |          |                          |                          |                                                 |                          |                          |          |                          |                          |  |
| k. नखूना                                                | <input type="checkbox"/>                                                                                                                                                                                                                           | <input type="checkbox"/>                                                                                                                                                                                                                                                                                                                                                                                                                                                                                                                                                                                                                                                                                                                                                                                                                                                                                                                                                                                                                                                                                                                                                                                                                                                                                                                                                                                                                                                                                                                                                                                                                                                                                                                                                                                                                                                                                                                                                                                                                                                                                                              |                                                                                                                                                                                                         |     |      |                              |                          |                          |              |                          |                          |                |                          |                          |                        |                          |                          |                |                          |                          |            |                          |                          |         |                          |                          |                                                         |                          |                          |          |                          |                          |                                                 |                          |                          |          |                          |                          |  |
| 4.                                                      | <p>What is the source of information about eye disease to you and your family members?<br/><b>(Multiple response possible)</b><br/>आपको एवं आपके परिवारजनों को आँखों की बिमारी संबंधी जानकारी कहाँ से मिलती है?<br/>(एक से अधिक उत्तर संभव है)</p> |                                                                                                                                                                                                                                                                                                                                                                                                                                                                                                                                                                                                                                                                                                                                                                                                                                                                                                                                                                                                                                                                                                                                                                                                                                                                                                                                                                                                                                                                                                                                                                                                                                                                                                                                                                                                                                                                                                                                                                                                                                                                                                                                       | <p>a. स्वास्थ्य कार्यकर्ता<br/>b. टेलीविजन<br/>c. समाचार पत्रों द्वारा/पम्पलेट्स (Pamphlets)<br/>d. रेडियो (Radio)<br/>e. पड़ोसी<br/>f. रिश्तेदार/घर का सदस्य<br/>g. अन्य<br/>h. कहीं से नहीं मिलती</p> |     |      |                              |                          |                          |              |                          |                          |                |                          |                          |                        |                          |                          |                |                          |                          |            |                          |                          |         |                          |                          |                                                         |                          |                          |          |                          |                          |                                                 |                          |                          |          |                          |                          |  |

|           |                                                                                                                                                                                                                                                                                                                               |                                                                   |                                                                                                                                                                                                                                                                                                                                                                                 |
|-----------|-------------------------------------------------------------------------------------------------------------------------------------------------------------------------------------------------------------------------------------------------------------------------------------------------------------------------------|-------------------------------------------------------------------|---------------------------------------------------------------------------------------------------------------------------------------------------------------------------------------------------------------------------------------------------------------------------------------------------------------------------------------------------------------------------------|
| <p>5.</p> | <p>If case of any eye problem, whom do you consult first?<br/> <b>(Multiple response possible)</b><br/>         (If answer 'a' or 'b' in no then go to QNo. 9)</p> <p>आँख की समस्या होने पर आप पहले कहाँ जाते हैं?<br/> <b>(एक से अधिक उत्तर संभव है)</b><br/>         (यदि उत्तर 'a' या 'b' है तो प्रश्न सं० 7 पर जायें)</p> |                                                                   | <p>a. निजी नेत्र विशेषज्ञ<br/>         b. सरकारी अस्पताल के नेत्र विशेषज्ञ के पास<br/>         c. सामान्य डाक्टर/स्थानीय चिकित्सक<br/>         d. सरकारी डिस्पेन्सरी/प्राथमिक स्वास्थ्य केन्द्र<br/>         e. हकीम/वैद्य/गैर पंजीकृत चिकित्सक<br/>         f. दवा की दुकान<br/>         g. अन्य</p>                                                                           |
| <p>6.</p> | <p>In case you do not go to an eye doctor for your eye problems, what are the various reasons?<br/> <b>(Multiple response possible)</b></p> <p>यदि आप या आपके परिवारजन नेत्र चिकित्सक को नहीं दिखाते हैं तो नेत्र चिकित्सक के पास नहीं पहुँचने के क्या-क्या कारण हैं?(एक से अधिक उत्तर संभव है)</p>                           |                                                                   | <p>a. नेत्र चिकित्सक के विषय में अज्ञानता<br/>         b. आँख का स्वास्थ्य महत्वपूर्ण नहीं है<br/>         c. अस्पताल जाने में समय बहुत लगता है<br/>         d. इलाज से डर लगता है<br/>         e. स्थानीय चिकित्सक का उपचार संतोषजनक है<br/>         f. आर्थिक कारण<br/>         g. परिवारिक कारण<br/>         h. अन्य</p>                                                     |
| <p>7.</p> | <p>Have you ever used eye medicine on your own without consulting the doctor?<br/>         (If answer is 'No' then go to Q.No.-9)</p> <p>क्या आपने ने कभी नेत्र चिकित्सक के सलाह के बिना, आँखों की दवाई ली है?<br/>         (यदि उत्तर 'नहीं' है तो प्रश्न सं० 9 पर जायें)</p>                                                | <p>हाँ <input type="checkbox"/> नहीं <input type="checkbox"/></p> |                                                                                                                                                                                                                                                                                                                                                                                 |
| <p>8.</p> | <p>If "Yes" then for which eye problems, do you use eye medicine on your own without consulting the doctor?<br/> <b>(Multiple response possible)</b></p> <p>यदि हाँ तो आँख की कौन-कौन सी समस्या के लिये?<br/> <b>(एक से अधिक उत्तर संभव है)</b></p>                                                                           |                                                                   | <p>a. आँखों का लाल होना<br/>         b. आँखों से पानी आना<br/>         c. आँख में किरकिरी पड़ना<br/>         d. नजर कमजोर होना<br/>         e. आँखों में दर्द<br/>         f. आँखों में जलन<br/>         g. आँखों में खुजली<br/>         h. आँखों की सफाई के लिए<br/>         i. मोतिया रोकने के लिए<br/>         j. आँखों का संक्रमण (conjunctivitis)<br/>         k. अन्य</p> |

| 9.                                                         | <p>Is there any eye medicine available in your house?<br/> <b>(Multiple response possible)</b><br/>         (If answer is 'No' then to Q.No.-11)</p> <p>क्या आप के घर में आँख संबंधी कोई दवा उपलब्ध है?<br/> <b>(एक से अधिक उत्तर संभव है)</b><br/>         (यदि उत्तर 'नहीं' है तो प्रश्न सं० 11 पर जायें)</p>                                                                                                                                                                                                                                                                                                                                                                                                                                                                                                                                                                                                                                                                                                                                                                                                                                                                                                                                                                                                                                                                                                                                                                                                                                                                                                                                                                                                                             |                          | <p>a. दवाई नहीं है/मान्य नहीं है (Not Applicable)<br/>         b. Steroid<br/>         c. गुलाब जल<br/>         d. अन्य</p>                                                                                      |  |     |      |            |                                         |                          |                          |                          |                                         |                          |                          |                          |                                                |                          |                          |                          |                                          |                          |                          |                          |                                                            |                          |                          |                          |
|------------------------------------------------------------|---------------------------------------------------------------------------------------------------------------------------------------------------------------------------------------------------------------------------------------------------------------------------------------------------------------------------------------------------------------------------------------------------------------------------------------------------------------------------------------------------------------------------------------------------------------------------------------------------------------------------------------------------------------------------------------------------------------------------------------------------------------------------------------------------------------------------------------------------------------------------------------------------------------------------------------------------------------------------------------------------------------------------------------------------------------------------------------------------------------------------------------------------------------------------------------------------------------------------------------------------------------------------------------------------------------------------------------------------------------------------------------------------------------------------------------------------------------------------------------------------------------------------------------------------------------------------------------------------------------------------------------------------------------------------------------------------------------------------------------------|--------------------------|------------------------------------------------------------------------------------------------------------------------------------------------------------------------------------------------------------------|--|-----|------|------------|-----------------------------------------|--------------------------|--------------------------|--------------------------|-----------------------------------------|--------------------------|--------------------------|--------------------------|------------------------------------------------|--------------------------|--------------------------|--------------------------|------------------------------------------|--------------------------|--------------------------|--------------------------|------------------------------------------------------------|--------------------------|--------------------------|--------------------------|
| 10.                                                        | <p>What is the expiry date of the medicine?<br/>         दवा की Expiry Date क्या है ?</p>                                                                                                                                                                                                                                                                                                                                                                                                                                                                                                                                                                                                                                                                                                                                                                                                                                                                                                                                                                                                                                                                                                                                                                                                                                                                                                                                                                                                                                                                                                                                                                                                                                                   | _____                    | <p>a. दवा Expired है<br/>         b. दवा Expired नहीं है<br/>         c. दवा की Expiry Date उपलब्ध नहीं है</p>                                                                                                   |  |     |      |            |                                         |                          |                          |                          |                                         |                          |                          |                          |                                                |                          |                          |                          |                                          |                          |                          |                          |                                                            |                          |                          |                          |
| 11.                                                        | <p>In case of eye problems, do you apply anything beyond the eye medicine (TEM)? <b>(Multiple response possible)</b></p> <p>आँख की समस्या होने पर, क्या आप दवा के अतिरिक्त कुछ और इस्तेमाल करते हैं ? (उल्लेख करें)<br/> <b>(एक से अधिक उत्तर संभव है)</b></p>                                                                                                                                                                                                                                                                                                                                                                                                                                                                                                                                                                                                                                                                                                                                                                                                                                                                                                                                                                                                                                                                                                                                                                                                                                                                                                                                                                                                                                                                              |                          | <p>a. दुध<br/>         b. नारियल का तेल<br/>         c. घी<br/>         d. शहद<br/>         e. काजल/सुरमा<br/>         f. हल्दी<br/>         g. नीम/नीम का लेप<br/>         h. अन्य<br/>         i. कुछ नहीं</p> |  |     |      |            |                                         |                          |                          |                          |                                         |                          |                          |                          |                                                |                          |                          |                          |                                          |                          |                          |                          |                                                            |                          |                          |                          |
| 12.                                                        | <p>In case of trauma to the eye, when do you think you should seek advice from the eye doctor?<br/>         यदि आँख में चोट लगती है, तो आप के अनुसार नेत्र चिकित्सक की सलाह कितने समय में लेनी चाहिए ?</p>                                                                                                                                                                                                                                                                                                                                                                                                                                                                                                                                                                                                                                                                                                                                                                                                                                                                                                                                                                                                                                                                                                                                                                                                                                                                                                                                                                                                                                                                                                                                  | _____                    | <p>a. तुरन्त<br/>         b. 0-6 घंटे<br/>         c. 7-24 घंटे<br/>         d. 1-7 दिन<br/>         e. किसी भी समय<br/>         f. आवश्यकतानुसार<br/>         g. नहीं मालूम</p>                                 |  |     |      |            |                                         |                          |                          |                          |                                         |                          |                          |                          |                                                |                          |                          |                          |                                          |                          |                          |                          |                                                            |                          |                          |                          |
| 13.                                                        | <p>Can the following things cause of injury to the eye?<br/>         क्या इन वस्तुओं से आँखों को नुकसान हो सकता है ?</p> <table style="width: 100%; border: none;"> <thead> <tr> <th style="width: 40%;"></th> <th style="width: 10%; text-align: center;">हाँ</th> <th style="width: 10%; text-align: center;">नहीं</th> <th style="width: 10%; text-align: center;">नहीं मालूम</th> </tr> </thead> <tbody> <tr> <td>a. आँख में गुलाब जल डालने से (Gulabjal)</td> <td style="text-align: center;"><input type="checkbox"/></td> <td style="text-align: center;"><input type="checkbox"/></td> <td style="text-align: center;"><input type="checkbox"/></td> </tr> <tr> <td>b. आँख में चूना गिरने से (Chuna injury)</td> <td style="text-align: center;"><input type="checkbox"/></td> <td style="text-align: center;"><input type="checkbox"/></td> <td style="text-align: center;"><input type="checkbox"/></td> </tr> <tr> <td>c. आँख में होली के रंग गिरने से (Holi colors )</td> <td style="text-align: center;"><input type="checkbox"/></td> <td style="text-align: center;"><input type="checkbox"/></td> <td style="text-align: center;"><input type="checkbox"/></td> </tr> <tr> <td>d. पटाखे की चोट से (Fire cracker injury)</td> <td style="text-align: center;"><input type="checkbox"/></td> <td style="text-align: center;"><input type="checkbox"/></td> <td style="text-align: center;"><input type="checkbox"/></td> </tr> <tr> <td>e. आँखों में तेजाब, फिनाईल पड़ने से (Acid &amp; Phenyl injury)</td> <td style="text-align: center;"><input type="checkbox"/></td> <td style="text-align: center;"><input type="checkbox"/></td> <td style="text-align: center;"><input type="checkbox"/></td> </tr> </tbody> </table> |                          |                                                                                                                                                                                                                  |  | हाँ | नहीं | नहीं मालूम | a. आँख में गुलाब जल डालने से (Gulabjal) | <input type="checkbox"/> | <input type="checkbox"/> | <input type="checkbox"/> | b. आँख में चूना गिरने से (Chuna injury) | <input type="checkbox"/> | <input type="checkbox"/> | <input type="checkbox"/> | c. आँख में होली के रंग गिरने से (Holi colors ) | <input type="checkbox"/> | <input type="checkbox"/> | <input type="checkbox"/> | d. पटाखे की चोट से (Fire cracker injury) | <input type="checkbox"/> | <input type="checkbox"/> | <input type="checkbox"/> | e. आँखों में तेजाब, फिनाईल पड़ने से (Acid & Phenyl injury) | <input type="checkbox"/> | <input type="checkbox"/> | <input type="checkbox"/> |
|                                                            | हाँ                                                                                                                                                                                                                                                                                                                                                                                                                                                                                                                                                                                                                                                                                                                                                                                                                                                                                                                                                                                                                                                                                                                                                                                                                                                                                                                                                                                                                                                                                                                                                                                                                                                                                                                                         | नहीं                     | नहीं मालूम                                                                                                                                                                                                       |  |     |      |            |                                         |                          |                          |                          |                                         |                          |                          |                          |                                                |                          |                          |                          |                                          |                          |                          |                          |                                                            |                          |                          |                          |
| a. आँख में गुलाब जल डालने से (Gulabjal)                    | <input type="checkbox"/>                                                                                                                                                                                                                                                                                                                                                                                                                                                                                                                                                                                                                                                                                                                                                                                                                                                                                                                                                                                                                                                                                                                                                                                                                                                                                                                                                                                                                                                                                                                                                                                                                                                                                                                    | <input type="checkbox"/> | <input type="checkbox"/>                                                                                                                                                                                         |  |     |      |            |                                         |                          |                          |                          |                                         |                          |                          |                          |                                                |                          |                          |                          |                                          |                          |                          |                          |                                                            |                          |                          |                          |
| b. आँख में चूना गिरने से (Chuna injury)                    | <input type="checkbox"/>                                                                                                                                                                                                                                                                                                                                                                                                                                                                                                                                                                                                                                                                                                                                                                                                                                                                                                                                                                                                                                                                                                                                                                                                                                                                                                                                                                                                                                                                                                                                                                                                                                                                                                                    | <input type="checkbox"/> | <input type="checkbox"/>                                                                                                                                                                                         |  |     |      |            |                                         |                          |                          |                          |                                         |                          |                          |                          |                                                |                          |                          |                          |                                          |                          |                          |                          |                                                            |                          |                          |                          |
| c. आँख में होली के रंग गिरने से (Holi colors )             | <input type="checkbox"/>                                                                                                                                                                                                                                                                                                                                                                                                                                                                                                                                                                                                                                                                                                                                                                                                                                                                                                                                                                                                                                                                                                                                                                                                                                                                                                                                                                                                                                                                                                                                                                                                                                                                                                                    | <input type="checkbox"/> | <input type="checkbox"/>                                                                                                                                                                                         |  |     |      |            |                                         |                          |                          |                          |                                         |                          |                          |                          |                                                |                          |                          |                          |                                          |                          |                          |                          |                                                            |                          |                          |                          |
| d. पटाखे की चोट से (Fire cracker injury)                   | <input type="checkbox"/>                                                                                                                                                                                                                                                                                                                                                                                                                                                                                                                                                                                                                                                                                                                                                                                                                                                                                                                                                                                                                                                                                                                                                                                                                                                                                                                                                                                                                                                                                                                                                                                                                                                                                                                    | <input type="checkbox"/> | <input type="checkbox"/>                                                                                                                                                                                         |  |     |      |            |                                         |                          |                          |                          |                                         |                          |                          |                          |                                                |                          |                          |                          |                                          |                          |                          |                          |                                                            |                          |                          |                          |
| e. आँखों में तेजाब, फिनाईल पड़ने से (Acid & Phenyl injury) | <input type="checkbox"/>                                                                                                                                                                                                                                                                                                                                                                                                                                                                                                                                                                                                                                                                                                                                                                                                                                                                                                                                                                                                                                                                                                                                                                                                                                                                                                                                                                                                                                                                                                                                                                                                                                                                                                                    | <input type="checkbox"/> | <input type="checkbox"/>                                                                                                                                                                                         |  |     |      |            |                                         |                          |                          |                          |                                         |                          |                          |                          |                                                |                          |                          |                          |                                          |                          |                          |                          |                                                            |                          |                          |                          |

|     |                                                                                                                                                                                                                                                       |                                                                        |                                                                                                                                                                             |
|-----|-------------------------------------------------------------------------------------------------------------------------------------------------------------------------------------------------------------------------------------------------------|------------------------------------------------------------------------|-----------------------------------------------------------------------------------------------------------------------------------------------------------------------------|
| 14. | <p>In case of minor trauma with vegetative matter, do you consult an eye doctor?</p> <p>फसल/खेत संबंधी कार्य करते समय अगर आँख में छोटी चोट या खरोंच लगती है तो क्या आप डाक्टर से संपर्क करते हैं?</p>                                                 |                                                                        | <p>a. हाँ<br/>b. नहीं<br/>c. फसल/खेत संबंधी कार्य नहीं करते हैं</p>                                                                                                         |
| 15. | <p>Do you know that deficiency of Vitamin 'A' mostly affects which age group?</p> <p>क्या आप जानते हैं, विटामिन 'A' की कमी किस उम्र को अधिकतर प्रभावित करती है?</p>                                                                                   | <p>_____</p>                                                           | <p>a. 0-6 वर्ष में<br/>b. गर्भवती महिलाओं में<br/>c. अन्य<br/>d. नहीं मालूम</p>                                                                                             |
| 16. | <p>Can you tell us about the sources of vitamin 'A' in our diet?</p> <p>हमारे आहार में विटामिन 'A' के क्या-क्या स्रोत हैं?</p>                                                                                                                        |                                                                        | <p>a. हरी पत्तेदार सब्जियाँ<br/>b. पीले और नारंगी फल जैसे –पपीता, आम, कद्दू<br/>c. दुध<br/>d. दाल<br/>e. अंडा<br/>f. आलू<br/>g. मांस/मछली<br/>h. अन्य<br/>i. नहीं मालूम</p> |
| 17. | <p>When is the immunization for measles administered?</p> <p>खसरे का टीका कब लगाया जाता है?</p>                                                                                                                                                       |                                                                        | <p>a. 0-9 महीने में<br/>b. 10-12 महीने में<br/>c. 1-5 वर्ष में<br/>d. अन्य<br/>e. नहीं मालूम</p>                                                                            |
| 18. | <p>Have you ever heard about eye donation?<br/><b>(If answer is 'No', then interview is over)</b></p> <p>क्या आपने कभी आँख दान (नेत्रदान) के बारे में सुना है?<br/>(यदि उत्तर 'नहीं' है तो आगे के प्रश्नों को नहीं पूछें, साक्षत्कार समाप्त करें)</p> | <p>हाँ <input type="checkbox"/>      नहीं <input type="checkbox"/></p> |                                                                                                                                                                             |

|            |                                                                                                                                                                                                       |       |                                                                                                                                                                                                                                                                                                                                      |
|------------|-------------------------------------------------------------------------------------------------------------------------------------------------------------------------------------------------------|-------|--------------------------------------------------------------------------------------------------------------------------------------------------------------------------------------------------------------------------------------------------------------------------------------------------------------------------------------|
| <p>19.</p> | <p>When should eyes be donated? (If answer is not 'b' then go to QNo. 21)</p> <p>क्या आप जानते हैं कि आँख दान कब किया जाता है? (उल्लेख करें)<br/>(यदि उत्तर 'b' नहीं है तो प्रश्न सं० 21 पर जाये)</p> | <hr/> | <p>a. मृत्यु के पहले<br/>b. मृत्यु के बाद<br/>c. किसी भी उम्र में<br/>d. अन्य<br/>e. नहीं मालूम</p>                                                                                                                                                                                                                                  |
| <p>20.</p> | <p>Do you know that till what time after death can eyes be donated and used?</p> <p>क्या आप जानते हैं कि मृत्यु के बाद आँख दान कितने समय के अन्दर करनी चाहिये?</p>                                    | <hr/> | <p>a. 0-6 घंटे में<br/>b. 7-24 घंटे में<br/>c. 24 घंटे से अधिक समय<br/>d. कभी भी<br/>e. नहीं मालूम</p>                                                                                                                                                                                                                               |
| <p>21.</p> | <p>According to you, why don't people donate their eyes?<br/><b>(Multiple response possible)</b></p> <p>आप के अनुसार लोग, आँख दान क्यों नहीं करते हैं?<br/>(एक से अधिक उत्तर संभव हैं)</p>            |       | <p>a. अज्ञानता<br/>b. रिश्तेदारों द्वारा आपत्ति<br/>c. समय का अभाव<br/>d. धार्मिक मान्यता<br/>e. शरीर की बनावट खराब हो जाती है/ शरीर से आँखों को अलग करना अस्वीकार<br/>f. कानूनी समस्या<br/>g. आँख दान करने से मरने वाले की आत्मा को शान्ति नहीं मिलती<br/>h. आँखें या शरीर अस्वस्थ होने की वजह से<br/>i. अन्य<br/>j. नहीं मालूम</p> |
| <p>22.</p> | <p>Do you know what kind of blindness can be corrected by corneal transplantation?</p> <p>क्या आप जानते हैं कि आँख दान के द्वारा किस प्रकार की अंधता को दूर किया जा सकता है?</p>                      |       | <p>a. पुतली पर सफेद दाग<br/>b. काला मोतिया<br/>c. सफेद मोतिया<br/>d. आँख के परदे की बीमारी<br/>e. जन्मजात अंधापन<br/>f. अन्य<br/>g. नहीं मालूम</p>                                                                                                                                                                                   |

|                                                         |                                                                                                                                                           |
|---------------------------------------------------------|-----------------------------------------------------------------------------------------------------------------------------------------------------------|
| <p>Status of Interview</p> <p>साक्षात्कार की स्थिति</p> | <p>1.Completed interview ( पूर्ण साक्षात्कार)</p> <p>2.Incomplete interview ( अपूर्ण साक्षात्कार)</p> <p>66.Others (Specify) अन्य (उल्लेख करें) _____</p> |
|---------------------------------------------------------|-----------------------------------------------------------------------------------------------------------------------------------------------------------|

Signature of Interviewer:

Name of Interviewer:
